# Supplementary material for: Radial artery harvesting in coronary artery bypass grafting surgery—Endoscopic or open method? A meta-analysis
Source: PLOS journal article supplement (doi:10.1371/journal.pone.0236499), 2020-07-24
Supplement: S1 (10.1371/journal.pone.0236499.s001) [file journal.pone.0236499.s001]

- 
- 1 endoscopic
  - 2 tunnel
  - 3 coronary artery bypass surgery
  - 4 CABG
  - 5 radial artery
  - 6 harvest\*
  - 7 (#1 or #2)
  - 8 (#3 or #4)
  - 9 (#7 and #8 and #5 and #6)

Limited: article, article in press, conference review, review

Clinical article, clinical trial, cohort analysis, comparative comparative study, controlled clinical trial, controlled study, human, intermethod comparison, major clinical study, methodology, practice guideline, prospective study, retrospective study.

---

|          |     |
|----------|-----|
| Embase   | 136 |
| Pubmed   | 334 |
| Medline  | 180 |
| Cochrane | 21  |
| Total    | 379 |

### **Except**

|                                              |     |
|----------------------------------------------|-----|
| No relation with our study or comparing data | 343 |
| Meta-analysis                                | 6   |
| No endoscopic harvesting                     | 1   |
| Trial on progressing                         | 2   |

### **Including 22**

|                                  |    |
|----------------------------------|----|
| Randomized control trial         | 9  |
| Non-randomized controlled trial: |    |
| Without matching:                | 10 |
| Matching:                        | 3  |

Add 2 non-randomized controlled trail by reviewing reference.
